# Supplementary material
Source: Springer Nature journal article supplement (https://www.springermedizin.de/resource/supplementary/12875_2013_1038_MOESM1_ESM.pdf/9435980)

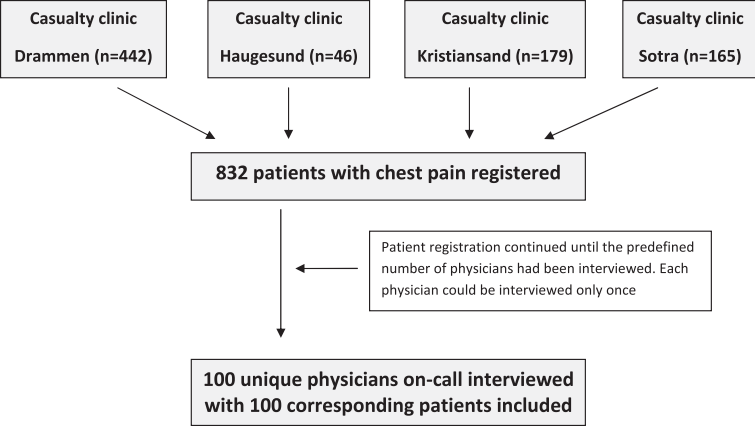

Supplement: MOESM1 [file 9435980]
